# Supplementary material
Source: PubMed Central journal article supplement (PMC2245842)
Supplement: plntphys_pp.107.112334_1.pdf [file plntphys_pp.107.112334_1.pdf]

# Supplement 1

**A**

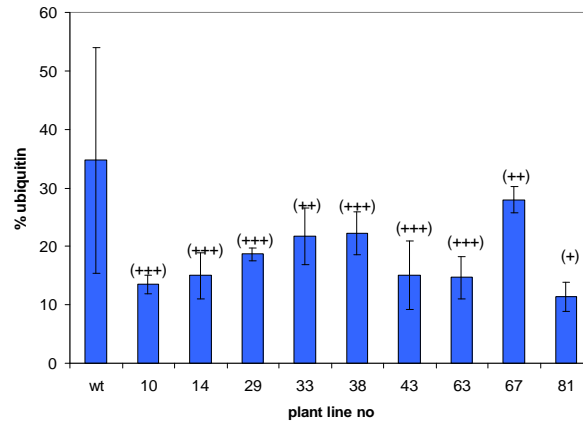

Quantification of the StSUT4 expression level in flowers of *S. tuberosum* Désirée (ssp. tuberosum) transformed with the StSUT4 RNAi-construct. Ubiquitin was used as internal standard for relative quantification via real time-PCR. The SD is given.

**B**

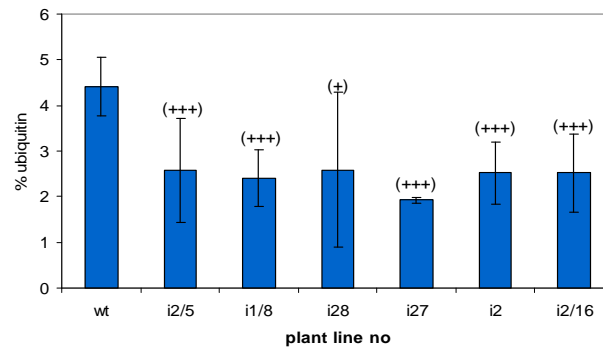

Real time PCR quantification of *StSUT4* expression in source leaves of *S. tuberosum* supsp. andigena transformed with the StSUT4-RNAi construct. Reduced *StSUT4* mRNA levels correlated with early flowering and tuber production under LD conditions in the greenhouse. Samples were collected during the light period at 3 pm. The SD is given.

| Transgenic line no              | 1 <sup>st</sup> experiment | 2 <sup>nd</sup> experiment | 3 <sup>rd</sup> experiment |
|---------------------------------|----------------------------|----------------------------|----------------------------|
| <i>S. tuberosum</i> andigena WT | -                          | -                          | -                          |
| i2/5                            | +                          | +                          | +                          |
| i28                             | nd                         | +                          | +                          |
| i2                              | nd                         | +                          | +                          |
| i2/16                           | +                          | +                          | +                          |
| i27                             | nd                         | +                          | nd                         |
| i1/8                            | +                          | +                          | -                          |

Tuber yield of *StSUT4*-RNAi andigena plants of three independent experiments. Tubers were harvested after 3 month of growth under non-inductive LD conditions in the greenhouse. + : tuber production, -: no tuber production, nd: not determined.
