# Supplementary material
Source: PubMed Central journal article supplement (PMC2245842)
Supplement: plntphys_pp.107.112334_2.pdf [file plntphys_pp.107.112334_2.pdf]

## Supplement 2

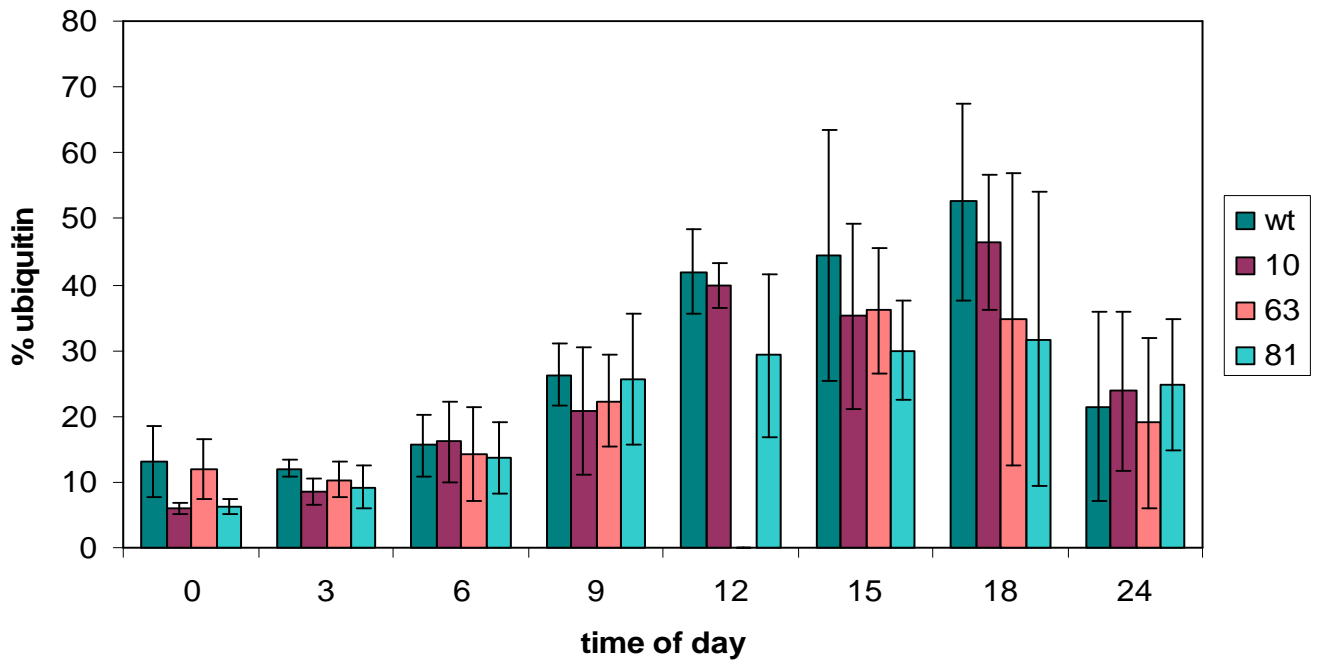

Quantification of the StSUT1 expression level in source leaves of *S. tuberosum* Désirée (ssp. *tuberosum*) transformed with the StSUT4 RNAi-construct. Ubiquitin was used as internal standard for relative quantification via real time-PCR. The SD is given. Alterations in StSUT1 expression levels in StSUT4 RNAi plants compared to potato WT plants are not significant.
