# Supplementary material
Source: PubMed Central journal article supplement (PMC2245842)
Supplement: plntphys_pp.107.112334_3.pdf [file plntphys_pp.107.112334_3.pdf]

## Supplement 3

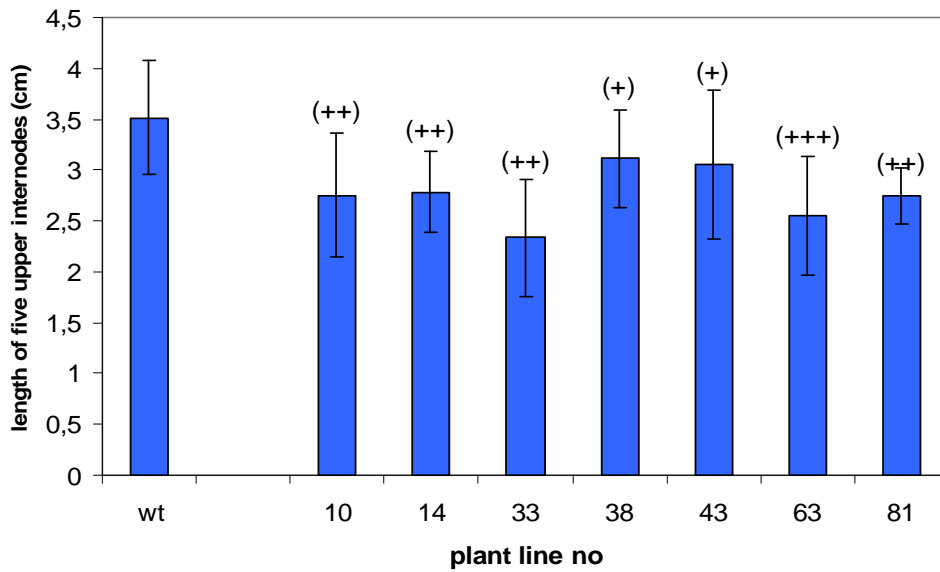

The length of the five upper internodes of StSUT4 RNAi plants grown under LD conditions in the greenhouse compared to potato WT plants grown under the same conditions.

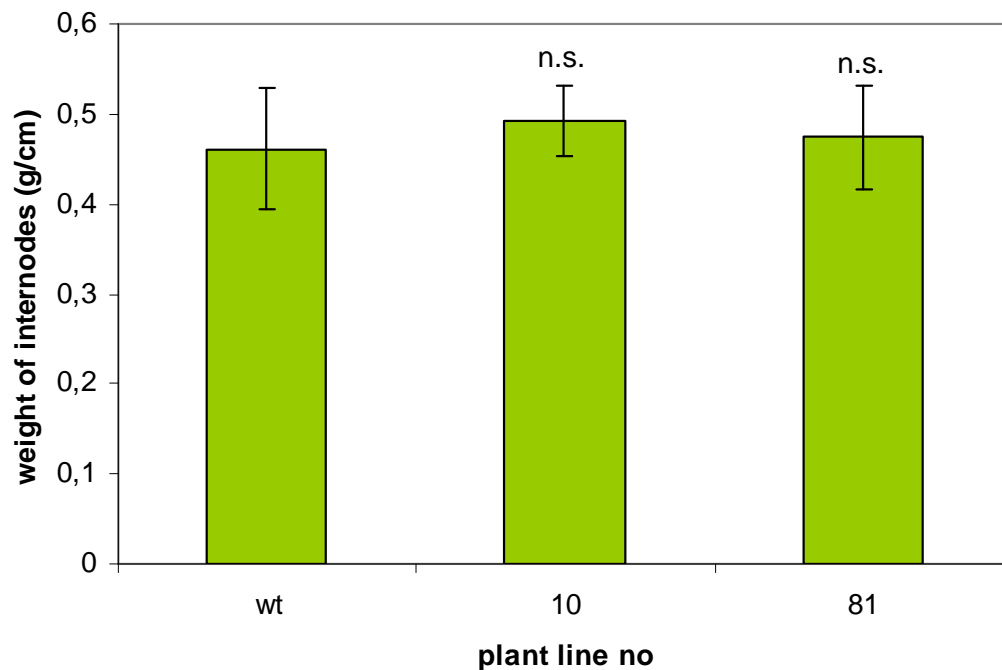

The weight of the seventh and eighth internode of potato WT and StSUT4 RNAi plants has been determined (n=14). The biomass of StSUT4 RNAi internodes compared to potato WT internodes is not significantly increased.
